# Supplementary material
Source: PubMed Central journal article supplement (PMC6990765)
Supplement: jamaoncol-6-375-s001.pdf [file jamaoncol-6-375-s001.pdf]

## Supplementary Online Content

Duan J, Cui L, Zhao X, et al. Use of immunotherapy with programmed cell death 1 vs programmed cell death ligand 1 inhibitors in patients with cancer: a systematic review and meta-analysis. Published online December 26, 2019. *JAMA Oncol*. doi:10.1001/jamaoncol.2019.5367

**eTable 1.** Search Strategy

**eTable 2.** Trial Characteristics

**eTable 3.** Risk of Bias for Each Included Study

**eTable 4.** Sensitivity Analysis of OS Results with Frequentist Approach

**eTable 5.** Meta-Regression Analysis

**eTable 6.** Sensitivity Analysis of PFS Results With Frequentist Approach

**eTable 7.** Model Fit Statistics With OS, Fixed- and Random-Effects Model

**eTable 8.** Model Fit Statistics With PFS, Fixed- and Random-Effects Model

**eTable 9.** Sensitivity Analysis of OS Results With Bayesian Approach

**eTable 10.** Sensitivity Analysis of PFS Results With Bayesian Approach

**eFigure 1.** Begg's Test for Publication Bias

**eFigure 2.** Forest Plot of Relative Hazard Ratios From Indirect Comparison of Overall Survival Outcomes in Patients Who Received Therapies Based on Anti-PD-1 Versus Those Based on Anti-PD-L1 With Frequentist Fixed-Effects Model

**eFigure 3.** Forest Plot of Pooled Hazard Ratios of Overall Survival Outcomes for Anti-PD-1 Versus Those Based on Anti-PD-L1 Stratified by Tumor Types With Frequentist Fixed-Effects Model

**eFigure 4.** Forest Plot of Relative Hazard Ratios From Indirect Comparison of Progression Free Survival in Patients Who Received Therapies Based on Anti-PD-1 Versus Those Based on Anti-PD-L1

**eFigure 5.** Forest Plot of Relative Hazard Ratios From Indirect Comparison of overall Survival Outcomes in Patients Who Received Therapies Based on Anti-PD-1 Versus Those Based on Anti-PD-L1 With Bayesian Approach

**eFigure 6.** Forest Plot of Relative Hazard Ratios From Indirect Comparison of progression Free Survival in Patients Who Received Therapies Based on Anti-PD-1 Versus Those Based on Anti-PD-L1 With Bayesian Approach

This supplementary material has been provided by the authors to give readers additional information about their work.

**eTable 1. Search strategy.**

| Database       | Keywords                                                                                                                                                                                                                                                                                                                                                                                                                                                                                            |
|----------------|-----------------------------------------------------------------------------------------------------------------------------------------------------------------------------------------------------------------------------------------------------------------------------------------------------------------------------------------------------------------------------------------------------------------------------------------------------------------------------------------------------|
| <b>PUBMED</b>  |                                                                                                                                                                                                                                                                                                                                                                                                                                                                                                     |
| #1             | nivolumab OR opdivo OR ono-4538 OR MDX-1106 OR BMS-936558 OR nivo OR pembrolizumab OR lambrolizumab OR keytruda OR SCH900475 OR MK-3475 OR atezolizumab OR tecentriq OR RO5541267 OR RG7446 OR MPDL3280A OR durvalumab OR imfinzi OR MEDI-4736 OR MEDI4736 OR avelumab OR barvencik OR MSB0010718C OR cemiplimab OR libtayo OR REGN2810                                                                                                                                                             |
| #2             | Programmed death-1 OR PD-1 OR PD1 OR Programmed death ligand-1 OR PD-L1 OR PDL1 OR checkpoint inhibitor OR checkpoint blockade                                                                                                                                                                                                                                                                                                                                                                      |
| #3             | #1 or #2                                                                                                                                                                                                                                                                                                                                                                                                                                                                                            |
| #4             | (((((randomized controlled trial) OR controlled clinical trial)) OR random*) OR groups)) AND (((clinical trials as topic[MeSH Terms]) OR (clinical AND trial AND topic)) OR clinical trials as topic) OR trial)                                                                                                                                                                                                                                                                                     |
| #5             | #3 and #4                                                                                                                                                                                                                                                                                                                                                                                                                                                                                           |
| #6             | 2000/01/01[PDAT] : 2019/03/01[PDAT]                                                                                                                                                                                                                                                                                                                                                                                                                                                                 |
| #7             | #5 AND #6                                                                                                                                                                                                                                                                                                                                                                                                                                                                                           |
|                |                                                                                                                                                                                                                                                                                                                                                                                                                                                                                                     |
| <b>EMABASE</b> |                                                                                                                                                                                                                                                                                                                                                                                                                                                                                                     |
| #1             | nivolumab OR opdivo OR 'ono 4538' OR 'mdx 1106' OR 'bms 936558' OR nivo OR pembrolizumab OR lambrolizumab OR keytruda OR sch900475 OR 'mk 3475' OR atezolizumab OR tecentriq OR ro5541267 OR rg7446 OR mpdl3280a OR durvalumab OR imfinzi OR 'medi 4736' OR medi4736 OR avelumab OR barvencik OR msb0010718c OR cemiplimab OR libtayo OR regn2810                                                                                                                                                   |
| #2             | 'programmed death-1' OR 'pd-1' OR 'pd1' OR 'programmed death ligand-1' OR 'pd-l1' OR 'pdl1' OR 'checkpoint inhibitor' OR 'checkpoint blockade'                                                                                                                                                                                                                                                                                                                                                      |
| #3             | #1 OR #2                                                                                                                                                                                                                                                                                                                                                                                                                                                                                            |
| #4             | 'clinical trials as topic' OR trial                                                                                                                                                                                                                                                                                                                                                                                                                                                                 |
| #5             | 'randomized controlled trial' OR 'controlled clinical trial' OR 'random*' OR groups                                                                                                                                                                                                                                                                                                                                                                                                                 |
| #6             | #4 NAD #5                                                                                                                                                                                                                                                                                                                                                                                                                                                                                           |
| #7             | #3 AND #6                                                                                                                                                                                                                                                                                                                                                                                                                                                                                           |
| #8             | #3 AND #6 AND [randomized controlled trial]/lim AND [humans]/lim AND [2000-2019]/py                                                                                                                                                                                                                                                                                                                                                                                                                 |
|                |                                                                                                                                                                                                                                                                                                                                                                                                                                                                                                     |
| <b>CENTRAL</b> |                                                                                                                                                                                                                                                                                                                                                                                                                                                                                                     |
| #1             | nivolumab OR opdivo OR 'ono 4538' OR 'mdx 1106' OR 'bms 936558' OR nivo OR pembrolizumab OR lambrolizumab OR keytruda OR sch900475 OR 'mk 3475' OR atezolizumab OR tecentriq OR ro5541267 OR rg7446 OR mpdl3280a OR durvalumab OR imfinzi OR 'medi 4736' OR medi4736 OR avelumab OR barvencik OR msb0010718c OR cemiplimab OR libtayo OR regn2810 OR 'programmed death-1' OR 'pd-1' OR 'pd1' OR 'programmed death ligand-1' OR 'pd-l1' OR 'pdl1' OR 'checkpoint inhibitor' OR 'checkpoint blockade' |
| #2             | AND ('clinical trials as topic' OR trial)                                                                                                                                                                                                                                                                                                                                                                                                                                                           |
| #3             | AND ('randomized controlled trial' OR 'controlled clinical trial' OR 'random*' OR groups)                                                                                                                                                                                                                                                                                                                                                                                                           |
| #4             | Publication Date: Jan 2000 to Mar 2019                                                                                                                                                                                                                                                                                                                                                                                                                                                              |

1 **eTable 2 Trial characteristics.**

| Author                     | Year | NCT Number  | Clinical trial      | Phase  | Tumor type   | Line | PD-L1 status    | Intervention type |
|----------------------------|------|-------------|---------------------|--------|--------------|------|-----------------|-------------------|
| <b>Brahmer</b>             | 2015 | NCT01642004 | CheckMate 017       | III    | NSCLC sq     | 2    | nonselective    | MONO              |
| <b>Borghaei</b>            | 2015 | NCT01673867 | CheckMate 057       | III    | NSCLC non-sq | 2    | nonselective    | MONO              |
| <b>Wu</b>                  | 2019 | NCT02613507 | CheckMate 078       | III    | NSCLC        | 2    | nonselective    | MONO              |
| <b>Rittmeyer</b>           | 2016 | NCT02008227 | OAK                 | III    | NSCLC        | 2    | nonselective    | MONO              |
| <b>Fehrenbacher</b>        | 2016 | NCT01903993 | POPLAR              | II     | NSCLC        | 2    | nonselective    | MONO              |
| <b>Herbst</b>              | 2015 | NCT01905657 | KEYNOTE-010 (10mg)  | II/III | NSCLC        | 2    | PD-L1 $\geq$ 1% | MONO              |
| <b>Herbst</b>              | 2015 | NCT01905657 | KEYNOTE-010 (2mg)   | II/III | NSCLC        | 2    | PD-L1 $\geq$ 1% | MONO              |
| <b>Barlesi<sup>a</sup></b> | 2018 | NCT02395172 | JAVELIN Lung 200    | III    | NSCLC        | 2    | PD-L1 $\geq$ 1% | MONO              |
| <b>Kang</b>                | 2017 | NCT02267343 | ATTRACTION-2        | III    | GC/GEJC      | 3    | nonselective    | MONO              |
| <b>Bang</b>                | 2018 | NCT02625623 | JAVELIN Gastric 300 | III    | GC/GEJC      | 3    | nonselective    | MONO              |
| <b>Bellmunt</b>            | 2017 | NCT02256436 | KEYNOTE-045         | III    | UC           | 2    | nonselective    | MONO              |
| <b>Powles</b>              | 2017 | NCT02302807 | IMvigor211          | III    | UC           | 2    | nonselective    | MONO              |
| <b>Langer</b>              | 2016 | NCT02039674 | KEYNOTE-021         | II     | NSCLC non-sq | 1    | nonselective    | COMBO             |
| <b>Gandhi</b>              | 2018 | NCT02578680 | KEYNOTE-189         | III    | NSCLC non-sq | 1    | nonselective    | COMBO             |
| <b>Cappuzzo</b>            | 2018 | NCT02367781 | IMpower130          | III    | NSCLC non-sq | 1    | nonselective    | COMBO             |
| <b>Barlesi<sup>b</sup></b> | 2018 | NCT02657434 | IMpower132          | III    | NSCLC non-sq | 1    | nonselective    | COMBO             |
| <b>Paz-Ares</b>            | 2018 | NCT02775435 | KEYNOTE-407         | III    | NSCLC sq     | 1    | nonselective    | COMBO             |
| <b>Jotte</b>               | 2018 | NCT02367794 | IMpower131          | III    | NSCLC sq     | 1    | nonselective    | COMBO             |
| <b>Motzer</b>              | 2019 | NCT02684006 | JAVELIN Renal 101   | III    | RCC          | 1    | nonselective    | COMBO             |
| <b>Rini</b>                | 2019 | NCT02853331 | KEYNOTE-426         | III    | RCC          | 1    | nonselective    | COMBO             |

2 (to be continued on next page)

3

4 (Continued)

| First Author               | Treatment       | Control     | Treatment  |       |                    |                 | Control    |       |                    |                 |
|----------------------------|-----------------|-------------|------------|-------|--------------------|-----------------|------------|-------|--------------------|-----------------|
|                            |                 |             | Male n (%) | Total | Median Age (range) | ECOG PS=0 n (%) | Male n (%) | Total | Median Age (range) | ECOG PS=0 n (%) |
| <b>Brahmer</b>             | Nivo            | DOC         | 111 (82)   | 135   | 62 (39-85)         | 27 (20)         | 97 (71)    | 137   | 64 (42-84)         | 37 (27)         |
| <b>Borghaei</b>            | Nivo            | DOC         | 151 (52)   | 292   | 61 (37-84)         | 84 (29)         | 168 (58)   | 290   | 64 (21-85)         | 95 (33)         |
| <b>Wu</b>                  | Nivo            | DOC         | 263 (78)   | 338   | 60 (27-78)         | 47 (14)         | 134 (81)   | 166   | 60 (38-78)         | 21 (13)         |
| <b>Rittmeyer</b>           | Ate             | DOC         | 261 (61)   | 425   | 63 (33-82)         | 155 (36)        | 259 (61)   | 425   | 64 (34-85)         | 160 (38)        |
| <b>Fehrenbacher</b>        | Ate             | DOC         | 93 (65)    | 144   | 62 (42-82)         | 46 (32)         | 76 (53)    | 143   | 62 (36-84)         | 45 (32)         |
| <b>Herbst</b>              | Pem             | DOC         | 213 (62)   | 346   | 63 (56-69)         | 112 (33)        | 209 (61)   | 343   | 62 (56-69)         | 116 (34)        |
| <b>Herbst</b>              | Pem             | DOC         | 212 (62)   | 344   | 63 (56-69)         | 120 (35)        | 209 (61)   | 343   | 62 (56-69)         | 116 (34)        |
| <b>Barlesi<sup>a</sup></b> | AVE             | DOC         | 182 (69)   | 264   | 64 (59-70)         | 96 (36)         | 185 (70)   | 265   | 63 (56-69)         | 91 (34)         |
| <b>Kang</b>                | Nivo            | Placebo     | 229 (69)   | 330   | 62 (54-69)         | 95 (29)         | 119 (73)   | 163   | 61 (53-68)         | 48 (29)         |
| <b>Bang</b>                | AVE             | PTX/IRI     | 140 (76)   | 185   | 59 (29-86)         | 66 (36)         | 127 (68)   | 186   | 61 (18-82)         | 62 (33)         |
| <b>Bellmunt</b>            | Pem             | PTX/DOC/VIN | 200 (74)   | 270   | 67 (29-88)         | 119 (44)        | 202 (74)   | 272   | 65 (26-84)         | 106 (39)        |
| <b>Powles</b>              | Ate             | PTX/DOC/VIN | 357 (76)   | 467   | 67 (33-88)         | 218 (47)        | 361 (78)   | 464   | 67 (31-84)         | 207 (45)        |
| <b>Langer</b>              | Pem+C+Pemex     | C+Pemex     | 22 (37)    | 60    | 62.5 (54-70)       | 24 (40)         | 26 (41)    | 63    | 63.2 (58-70)       | 29 (46)         |
| <b>Gandhi</b>              | Pem+C/Cis+Pemex | C/Cis+Pemex | 254 (62)   | 410   | 65 (34-84)         | 186 (45)        | 109 (53)   | 206   | 63.5 (34-84)       | 80 (39)         |
| <b>Cappuzzo</b>            | Ate+CnP         | CnP         | 266 (59)   | 451   | NA                 | 189 (42)        | 134 (59)   | 228   | NA                 | 91 (40)         |
| <b>Barlesi<sup>b</sup></b> | Ate+C/Cis+Pemex | C/Cis+Pemex | 192 (66)   | 292   | 64 (31-85)         | 126 (43)        | 192 (67)   | 286   | 63 (33-83)         | 114 (40)        |
| <b>Paz-Ares</b>            | Pem+C(n)P       | C(n)P       | 220 (79)   | 278   | 65 (29-87)         | 73 (26)         | 235 (84)   | 281   | 65 (36-88)         | 90 (32)         |
| <b>Jotte</b>               | Ate+CnP         | CnP         | 279 (81)   | 343   | 65 (23-83)         | 115 (34)        | 278 (82)   | 340   | 65 (38-86)         | 110 (32)        |
| <b>Motzer</b>              | AVE+AXI         | SUN         | 316 (72)   | 442   | 62 (29-83)         | 279 (63)        | 344 (78)   | 444   | 61 (27-88)         | 281 (63)        |
| <b>Rini</b>                | Pem+AXI         | SUN         | 308 (71)   | 432   | 62 (30-89)         | NA              | 320 (75)   | 429   | 61 (26-90)         | NA              |

5 (To be continued on next page)

6

7 (Continued)

| First Author               | Follow-up (month)          | Progression free survival |                    |                    | Overall survival |                    |                    |
|----------------------------|----------------------------|---------------------------|--------------------|--------------------|------------------|--------------------|--------------------|
|                            |                            | Hazard ratio              | 95% CI lower limit | 95% CI upper limit | Hazard ratio     | 95% CI lower limit | 95% CI upper limit |
| <b>Brahmer</b>             | 11.0 (minimum)             | 0.62                      | 0.47               | 0.81               | 0.59             | 0.44               | 0.79               |
| <b>Borghaei</b>            | 13.2 (minimum)             | 0.92                      | 0.77               | 1.11               | 0.73             | 0.60               | 0.89               |
| <b>Wu</b>                  | ICI:10.4/Ctl:8.8 (median)  | 0.77                      | 0.62               | 0.95               | 0.68             | 0.54               | 0.86               |
| <b>Rittmeyer</b>           | 21.0 (median)              | 0.95                      | 0.82               | 1.10               | 0.73             | 0.62               | 0.87               |
| <b>Fehrenbacher</b>        | ICI:14.8/Ctl:15.7 (median) | 0.94                      | 0.72               | 1.23               | 0.73             | 0.53               | 0.99               |
| <b>Herbst</b>              | 13.1 (median)              | 0.79                      | 0.66               | 0.94               | 0.61             | 0.49               | 0.75               |
| <b>Herbst</b>              | 13.1 (median)              | 0.88                      | 0.74               | 1.05               | 0.71             | 0.58               | 0.88               |
| <b>Barlesi<sup>a</sup></b> | 11.7 (minimum)             | 1.01                      | 0.81               | 1.26               | 0.90             | 0.73               | 1.11               |
| <b>Kang</b>                | ICI:8.9/Ctl:8.6 (median)   | 0.60                      | 0.49               | 0.75               | 0.63             | 0.51               | 0.78               |
| <b>Bang</b>                | ICI:10.6/Ctl:10.6 (median) | 1.73                      | 1.40               | 2.20               | 1.10             | 0.90               | 1.40               |
| <b>Bellmunt</b>            | 14.1 (median)              | 0.98                      | 0.81               | 1.19               | 0.73             | 0.59               | 0.91               |
| <b>Powles</b>              | 17.3 (median)              | NA                        | NA                 | NA                 | 0.85             | 0.73               | 0.99               |
| <b>Langer</b>              | 10.6 (median)              | 0.53                      | 0.31               | 0.91               | 0.90             | 0.42               | 1.91               |
| <b>Gandhi</b>              | 10.5 (median)              | 0.52                      | 0.43               | 0.64               | 0.49             | 0.38               | 0.64               |
| <b>Cappuzzo</b>            | ICI:18.5/Ctl:19.2 (median) | 0.64                      | 0.54               | 0.77               | 0.79             | 0.64               | 0.98               |
| <b>Barlesi<sup>b</sup></b> | ICI:18.9/Ctl:17.8 (median) | 0.60                      | 0.49               | 0.72               | 0.81             | 0.64               | 1.03               |
| <b>Paz-Ares</b>            | 7.8 (median)               | 0.56                      | 0.45               | 0.70               | 0.64             | 0.49               | 0.85               |
| <b>Jotte</b>               | 12.8 (minimum)             | 0.74                      | 0.62               | 0.87               | 0.92             | 0.76               | 1.12               |
| <b>Motzer</b>              | ICI:11.6/Ctl:10.7 (median) | 0.69                      | 0.56               | 0.84               | 0.78             | 0.55               | 1.08               |
| <b>Rini</b>                | 12.8 (median)              | 0.69                      | 0.57               | 0.84               | 0.53             | 0.38               | 0.74               |

8 Abbreviations: COMBO: Combination Therapy, UC: Urothelial Carcinoma, NSCLC: Non-Small Cell Lung Cancer, sq: squamous, Nsq: non-squamous, RCC: Renal Cell Carcinoma, C:  
9 Carboplatin, Cis: Cisplatin, (n)P: (nab-)Paclitaxel, Niv: Nivolumab; Pem: Pembrolizumab; Ate: Atezolizumab; AXI: Axitinib; SUN: Sunitinib; AVE: Avelumab; DOC: Docetaxel; PTX:  
10 Paclitaxel; Pemex: Pemetrexed; VIN: Vinflunine; IRI: Irinotecan; HR: Hazard Ratio; NA: Not available, ICI: Immune checkpoint inhibitor; Ctl: Control. a/b: Represents the same authors  
11 in different studies.

12

**eTable 3. Risk of bias for each included study.**

| Clinical trial      | Randomization | Allocation concealment | Blinding of participants and staff | Blinding of outcome assessors | Incomplete outcome data | Selective outcome reporting | Other sources of bias |
|---------------------|---------------|------------------------|------------------------------------|-------------------------------|-------------------------|-----------------------------|-----------------------|
| ATTRACTION-2        | low           | low                    | low                                | low                           | low                     | low                         | low                   |
| CheckMate 017       | low           | low                    | high                               | high                          | low                     | low                         | low                   |
| CheckMate 057       | low           | low                    | high                               | high                          | low                     | low                         | low                   |
| CheckMate 078       | low           | low                    | high                               | high                          | low                     | low                         | low                   |
| IMpower130          | low           | low                    | high                               | high                          | low                     | low                         | low                   |
| IMpower131          | low           | low                    | high                               | high                          | low                     | low                         | low                   |
| IMpower132          | low           | low                    | high                               | high                          | low                     | low                         | low                   |
| IMvigor211          | low           | low                    | high                               | high                          | low                     | low                         | low                   |
| JAVELIN Gastric 300 | low           | low                    | high                               | low                           | low                     | low                         | low                   |
| JAVELIN Lung 200    | low           | low                    | high                               | low                           | low                     | low                         | low                   |
| JAVELIN Renal 101   | low           | low                    | high                               | low                           | low                     | low                         | low                   |
| KEYNOTE-010         | low           | low                    | high                               | low                           | low                     | low                         | low                   |
| KEYNOTE-021         | low           | low                    | high                               | low                           | low                     | low                         | low                   |
| KEYNOTE-045         | low           | low                    | high                               | low                           | low                     | low                         | low                   |
| KEYNOTE-189         | low           | low                    | low                                | low                           | low                     | low                         | low                   |
| KEYNOTE-407         | low           | low                    | low                                | low                           | low                     | low                         | low                   |
| KEYNOTE-426         | low           | low                    | high                               | low                           | low                     | low                         | low                   |
| OAK                 | low           | low                    | high                               | high                          | low                     | low                         | low                   |
| POPLAR              | low           | low                    | high                               | high                          | low                     | low                         | low                   |

Low indicates no risk, high indicates high risk and unclear indicates unknown risk.

13

14

15 **eTable 4. Sensitivity analysis OS results with frequentist approach.**  
16

| Omitted tumor type | HR 95%CI          |
|--------------------|-------------------|
| NSCLC              | 0.70 [0.54, 0.92] |
| GC/GEJC            | 0.79 [0.70, 0.89] |
| UC                 | 0.73 [0.62, 0.85] |
| RCC                | 0.75 [0.64, 0.87] |

17  
18

19 **eTable 5. Meta-regression analysis.**

|                     | <b>P value</b>             | <b>P value</b>                |
|---------------------|----------------------------|-------------------------------|
|                     | <b>(univariable model)</b> | <b>(multivariable models)</b> |
| <b>Age</b>          | 0.79                       | 0.74                          |
| <b>PS_0 percent</b> | 0.42                       | 0.40                          |

20



21 **eTable 6. Sensitivity analysis PFS results with frequentist approach.**

| Omitted tumor type | HR 95%CI          |
|--------------------|-------------------|
| NSCLC              | 0.59 [0.21, 1.67] |
| GC/GEJC            | 0.84 [0.75, 0.95] |
| RCC                | 0.69 [0.51, 0.93] |

22

23 **eTable 7. Model fit statistics with OS, fixed- and random-effects model.**

| Tumor                                  | Line of treatment | Studies of PD-1 inhibitors  | Studies of PD-L1 inhibitors | DIC Random | DIC Fixed |
|----------------------------------------|-------------------|-----------------------------|-----------------------------|------------|-----------|
| <b>Monotherapy</b>                     |                   |                             |                             |            |           |
| Gastric carcinoma                      | ≥ 3               | ATTRACTION-2                | JAVELIN Gastric 300         | 3.987939   | 3.998393  |
| Non-small cell lung cancer             | ≥ 2               | CheckMate 017/057/078       | POPLAR/OAK                  | 7.064503   | 5.409897  |
| Non-small cell lung cancer (PD-L1+)    | ≥ 2               | KEYNOTE-010                 | JAVELIN Lung 200            | 4.018677   | 3.993914  |
| Urothelial carcinoma                   | ≤ 3               | KEYNOTE-045                 | IMvigor211                  | 4.009894   | 3.983779  |
|                                        |                   | <b>Pooled HR (subgroup)</b> |                             | 5.882423   | 4.931239  |
| <b>Combination therapy</b>             |                   |                             |                             |            |           |
| Nonsquamous non-small cell lung cancer | 1                 | KEYNOTE-021/189             | IMpower130/132              | 7.230631   | 6.23982   |
| Squamous non-small cell lung cancer    | 1                 | KEYNOTE-407                 | IMpower131                  | 4.005628   | 3.989342  |
| Renal cell carcinoma                   | 1                 | KEYNOTE-426                 | JAVELIN Renal 101           | 4.003938   | 4.00256   |
|                                        |                   | <b>Pooled HR (subgroup)</b> |                             | 3.409448   | 2.081451  |
|                                        |                   | <b>Pooled HR</b>            |                             | 9.256699   | 8.453085  |

Abbreviations: DIC: Deviance information criteria.

24  
25

26

27 **eTable 8. Model fit statistics with PFS, fixed- and random-effects model.**

| Tumor                                  | Line of treatment | Studies of                  | Studies of          | DIC      | DIC      |
|----------------------------------------|-------------------|-----------------------------|---------------------|----------|----------|
|                                        |                   | PD-1 inhibitors             | PD-L1 inhibitors    | Random   | Fixed    |
| <b>Monotherapy</b>                     |                   |                             |                     |          |          |
| Gastric carcinoma                      | ≥ 3               | ATTRACTION-2                | JAVELIN Gastric 300 | 3.989376 | 3.999893 |
| Non-small cell lung cancer             | ≥ 2               | CheckMate 017/057/078       | POPLAR/OAK          | 9.454495 | 9.723526 |
| Non-small cell lung cancer (PD-L1+)    | ≥ 2               | KEYNOTE-010                 | JAVELIN Lung 200    | 3.9786   | 4.008446 |
|                                        |                   | <b>Pooled HR (subgroup)</b> |                     | 5.37054  | 4.61229  |
| <b>Combination therapy</b>             |                   |                             |                     |          |          |
| Nonsquamous non-small cell lung cancer | 1                 | KEYNOTE-021/189             | IMpower130/132      | 5.818888 | 4.240688 |
| Squamous non-small cell lung cancer    | 1                 | KEYNOTE-407                 | IMpower131          | 3.991861 | 3.989388 |
| Renal cell carcinoma                   | 1                 | KEYNOTE-426                 | JAVELIN Renal 101   | 3.992372 | 3.997307 |
|                                        |                   | <b>Pooled HR (subgroup)</b> |                     | 3.510448 | 2.65747  |
|                                        |                   | <b>Pooled HR</b>            |                     | 7.270352 | 5.38697  |

28 Abbreviations: DIC: Deviance information criteria.

29 **eTable 9. Sensitivity analysis OS results with Bayesian approach.**

| Omitted tumor type | HR 95% CrI        |
|--------------------|-------------------|
| NSCLC              | 0.79 [0.64, 0.99] |
| GC/GEJC            | 0.79 [0.71, 0.89] |
| UC                 | 0.77 [0.68, 0.88] |
| RCC                | 0.80 [0.71, 0.89] |

30  
31

32 **eTable 10. Sensitivity analysis PFS results with Bayesian approach.**

| Omitted tumor type | HR 95% CrI        |
|--------------------|-------------------|
| NSCLC              | 0.65 [0.21, 1.85] |
| GC/GEJC            | 0.82 [0.71, 0.95] |
| RCC                | 0.79 [0.68, 0.92] |

33  
34

35 **eFigure1. Begg's test for publication bias.**

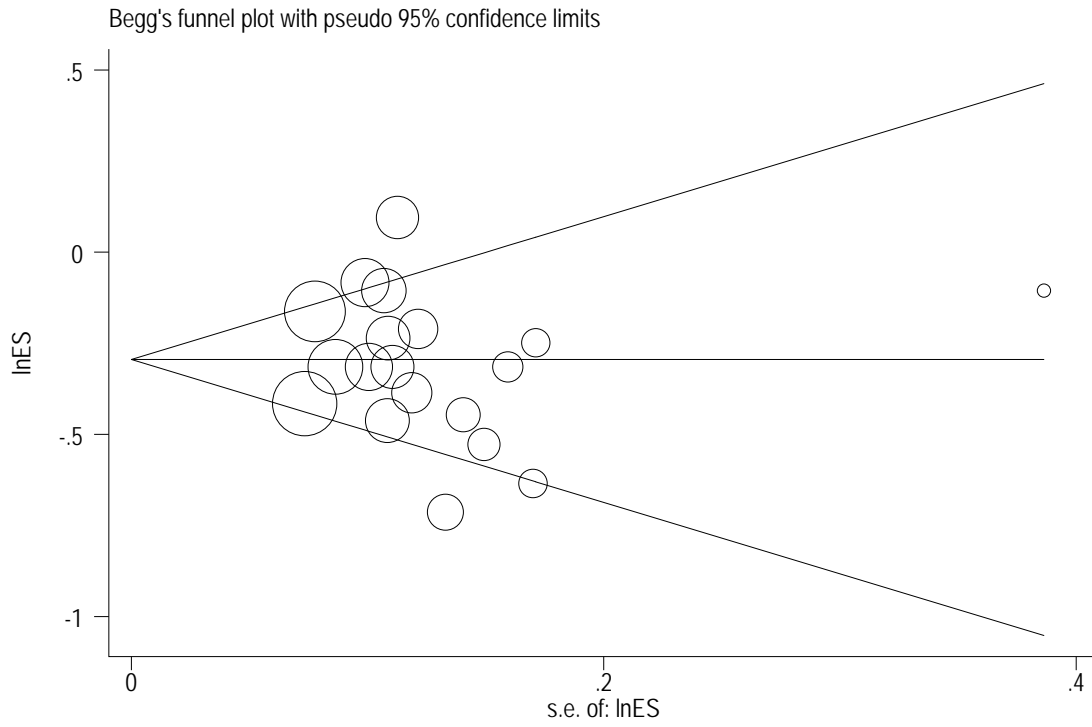

36  
37

38 **eFigure 2. Forest plot of relative hazard ratios from indirect comparison of**  
 39 **overall survival outcomes in patients who received therapies based on anti-**  
 40 **PD-1 versus those based on anti-PD-L1 with frequentist fixed-effects model.**

41 Squares represent adjusted indirect effect size (HR). Horizontal lines indicate the 95% CIs. Diamonds indicate the meta-  
 42 analytic pooled HRs, calculated separately in monotherapy and combination therapy subgroup, and the overall pooled  
 43 HRs in pan-cancer patients, with their corresponding 95% CIs. HR, hazard ratio; CI, confidence interval.

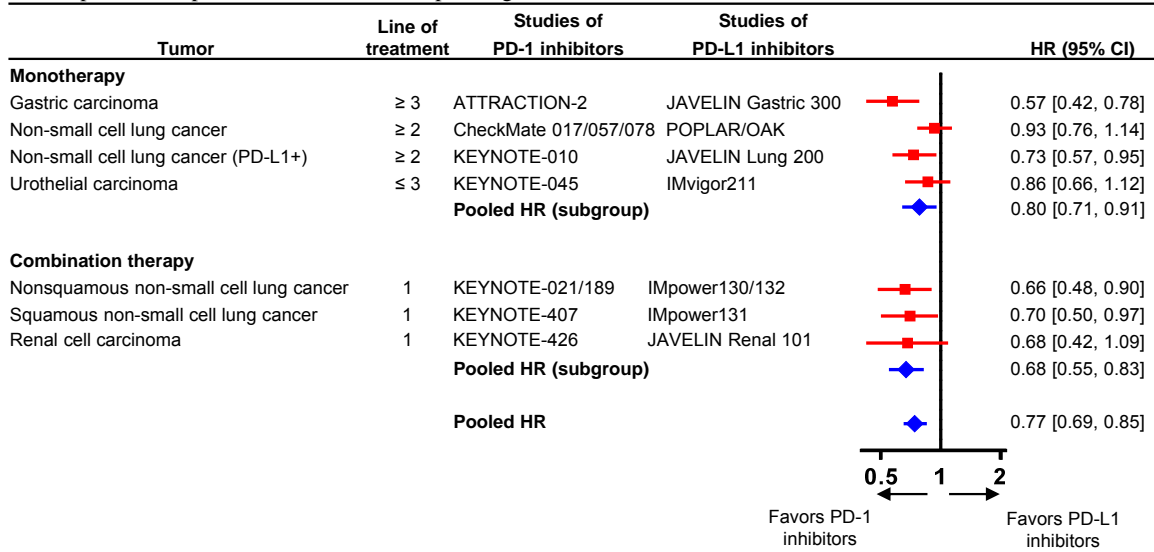

44  
 45  
 46

47 **eFigure 3. Forest plot of pooled hazard ratios of overall survival outcomes**  
 48 **for anti-PD-1 versus those based on anti-PD-L1 stratified by tumor types with**  
 49 **frequentist fixed-effects model.** Squares represent subgroup-specific pooled hazard ratios (HRs).  
 50 Horizontal lines indicate the 95% CIs. Diamonds indicate the meta-analytic pooled HRs, calculated separately in tumor  
 51 types, and the overall pooled HRs in pan-cancer patients, with their corresponding 95% CIs. HR, hazard ratio; CI, confidence  
 52 interval.

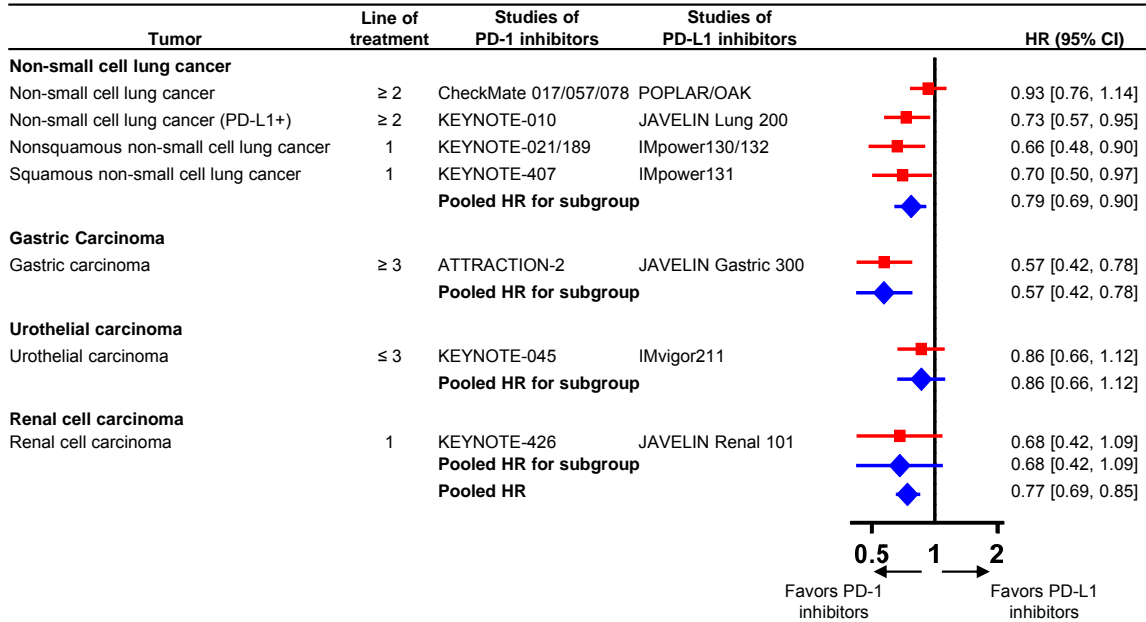

53  
54



55 **eFigure 4. Forest plot of relative hazard ratios from indirect comparison of**  
 56 **progression free survival in patients who received therapies based on anti-**  
 57 **PD-1 versus those based on anti-PD-L1.** Squares represent adjusted indirect effect size (HR).  
 58 Horizontal lines indicate the 95% CIs. Diamonds indicate the meta-analytic pooled HRs, calculated separately in  
 59 monotherapy and combination therapy, and the overall pooled HRs in pan-cancer patients, with their corresponding 95%  
 60 CIs. HR, hazard ratio; CI, confidence interval.

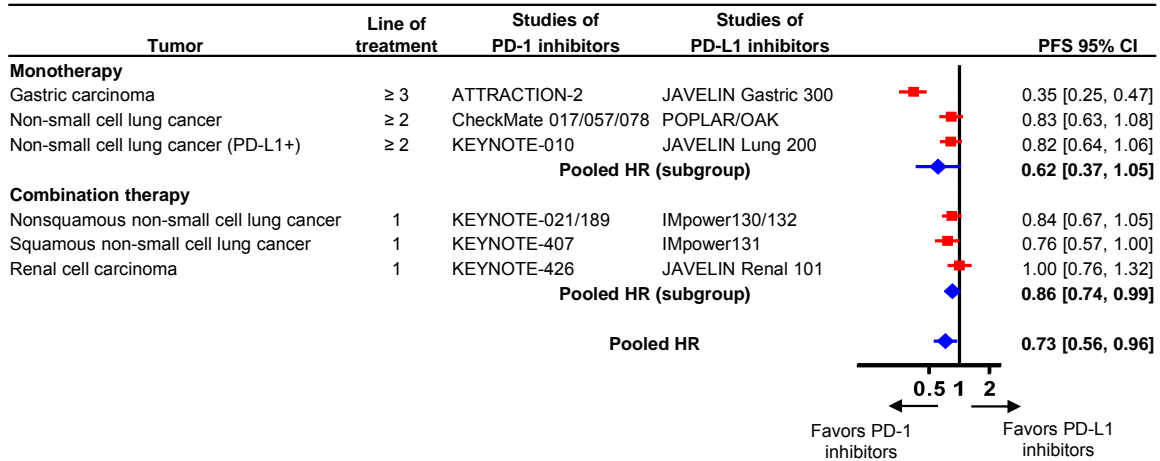

61  
 62  
 63

64 **eFigure 5. Forest plot of relative hazard ratios from indirect comparison of**  
 65 **overall survival outcomes in patients who received therapies based on anti-**  
 66 **PD-1 versus those based on anti-PD-L1 with Bayesian approach.** Squares represent  
 67 adjusted indirect effect size (HR). Horizontal lines indicate the 95% CrIs. Diamonds indicate the meta-analytic pooled HRs,  
 68 calculated separately in monotherapy and combination therapy subgroup, and the overall pooled HRs in pan-cancer patients,  
 69 with their corresponding 95% CrIs. HR, hazard ratio; CrI, credible interval.

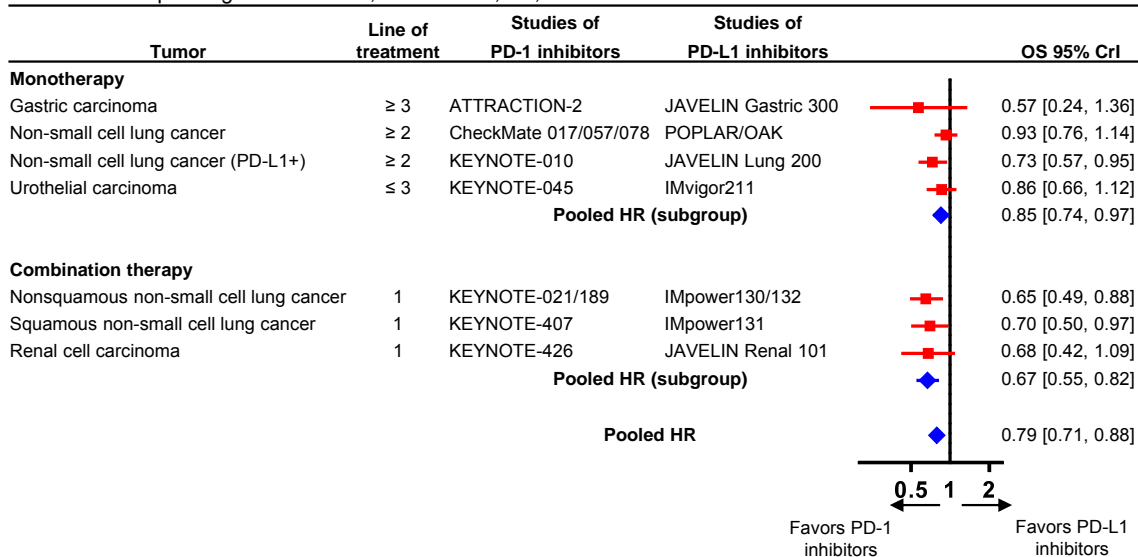

70  
 71  
 72

73 **eFigure 6. Forest plot of relative hazard ratios from indirect comparison of**  
 74 **progression free survival in patients who received therapies based on anti-**  
 75 **PD-1 versus those based on anti-PD-L1 with Bayesian approach.** Squares represent  
 76 adjusted indirect effect size (HR). Horizontal lines indicate the 95% CrIs. Diamonds indicate the meta-analytic pooled HRs,  
 77 calculated separately in monotherapy and combination therapy subgroup, and the overall pooled HRs in pan-cancer patients,  
 78 with their corresponding 95% CrIs. HR, hazard ratio; CrI, credible interval.

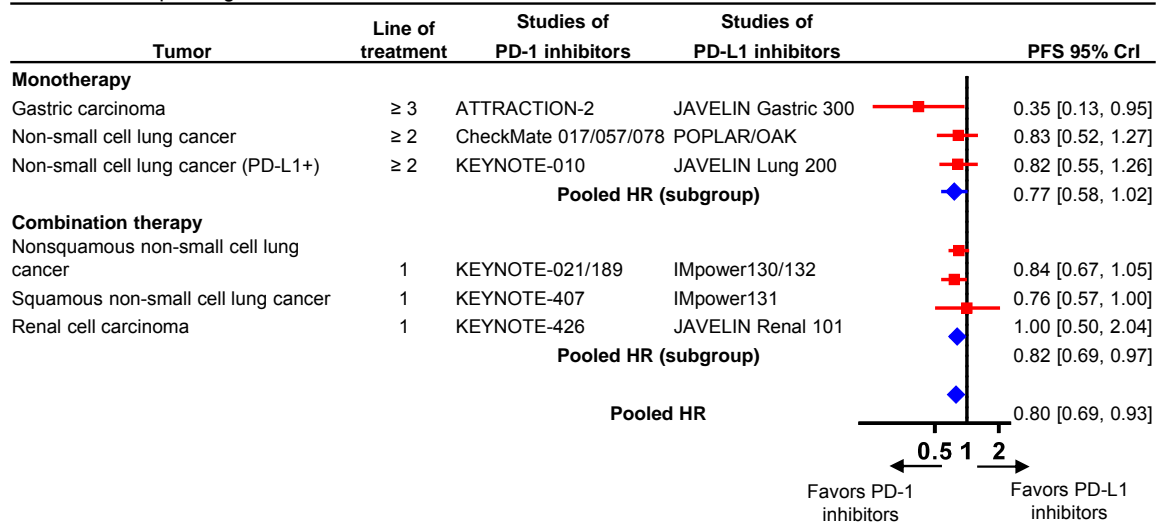

79  
 80  
 81
